# Supplementary material
Source: ML conference proceedings conference paper supplement (https://openaccess.thecvf.com/content/CVPR2023/html/Wang_Turning_Strengths_Into_CVPR_2023_paper.html)
Supplement: Supplementary file 1 [file Wang_Turning_Strengths_Into_CVPR_2023_supplemental.pdf]

Table 3. Dataset statistics.

| Dataset     | #Nodes | #Edges  | #Features | #Classes |
|-------------|--------|---------|-----------|----------|
| Cora        | 2,485  | 5,429   | 1,433     | 7        |
| Citeseer    | 2,110  | 3,757   | 3,703     | 6        |
| BlogCataLog | 5,196  | 343,486 | 8,189     | 6        |

---

**Algorithm 1** Certified robustness inspired PGD (CR-PGD) graph evasion attack to GNNs

---

**Input:** Node classifier  $f$ , graph  $G(\mathbf{A})$ , testing nodes  $\mathcal{V}_{Te}$ , perturbation budget  $\Delta$ , total iterations  $T$ , #samples  $N$ , noise parameter  $\beta$ , confidence level  $1 - \alpha$ ,  $a$ , interval  $INT$ .

**Output:** Adversarial graph perturbation  $\delta^{(T)}$ .

Initialize:  $t = 0$ ; graph perturbation  $\delta^{(0)} = 0$ ;

```

while  $t < T$  do
  // Stage 1: Obtaining the CR inspired loss
  if  $t \bmod INT \neq 0$  then
    Reuse the node weights:  $w^{(t)}(v) = w^{(t-1)}(v)$ ;
  else
    Define the perturbed graph:  $\mathbf{A}^{(t)} = \mathbf{A} \oplus \delta^{(t)}$ ;
    Sample  $N$  noise matrices  $\{\epsilon^j\}_{j=1}^N$  from the noise distribution Equation 7 with parameter  $\beta$ ;
    for each node  $v \in \mathcal{V}_{Te}$  do
      Compute the frequency  $N_{y_v}$  for label  $y_v$ :  $N_{y_v} = \sum_{j=1}^N \mathbb{I}(f(\mathbf{A}^{(t)} \oplus \epsilon^j; v) = y_v)$ ;
      Estimate the low bound probability  $\underline{p}_{y_v}$  with confidence  $1 - \alpha$ :  $\underline{p}_{y_v} = B(\alpha; N_{y_v}, N - N_{y_v} + 1)$ ;
      Calculate the certified perturbation size  $K(\underline{p}_{y_v})$  using  $\underline{p}_{y_v}$  and algorithm in [35];
      Assign a weight  $w(v)$  to each node  $v$ :  $w^{(t)}(v) = \frac{1}{1 + \exp(a \cdot K(\underline{p}_{y_v}))}$ ;
    end
  end
  Define the certified robustness inspired test loss:
   $\mathcal{L}_{CR}(f, \mathbf{A}^{(t)}, \mathcal{V}_{Te}) = \sum_{v \in \mathcal{V}_{Te}} w^{(t)}(v) \ell(f(\mathbf{A}^{(t)}; v), y_v)$ ;
  // Stage 2: Running the PGD attack with CR loss
   $\delta^{(t+1)} = \text{Proj}_{\mathbb{B}}(\delta^{(t)} + \eta \cdot \nabla_{\delta^{(t)}} \mathcal{L}_{CR}(f, \mathbf{A}^{(t)}, \mathcal{V}_{Te})$ ;
  Update  $t = t + 1$ .
end
return  $\delta^{(T)}$ 

```

---



---

**Algorithm 2** Certified robustness inspired Minmax (CR-Minmax) graph poisoning attack to GNNs

---

**Input:** GNN algorithm  $\mathcal{A}$ , Graph  $G(\mathbf{A})$ , training nodes  $\mathcal{V}_{Tr}$ , perturbation budget  $\Delta$ , number of samples  $N$ , noise parameter  $\beta$ , confidence level  $1 - \alpha$ ,  $a$ , interval  $INT$ .

**Output:** Adversarial graph perturbation  $\delta^{(T)}$ .

Initialize:  $t = 0$ ;  $\delta^{(0)} = 0$ ; random/pretrained GNN model  $\theta^{(0)}$ ;

```

while  $t < T$  do
  // Stage 1: Obtaining the CR inspired loss
  if  $t \bmod INT \neq 0$  then
    Reuse the node weights:  $w^{(t)}(v) = w^{(t-1)}(v)$ ;
  else
    Define the perturbed graph:  $\mathbf{A}^{(t)} = \mathbf{A} \oplus \delta^{(t)}$ ;
    Sample  $N$  noise matrices  $\{\epsilon^j\}_{j=1}^N$  from the noise distribution Equation 7 with parameter  $\beta$ ;
    Train  $N$  node classifiers  $\{\tilde{f}^n\}$  with current perturbed graph  $\mathbf{A}^{(t)}$  with the  $N$  sampled noisy matrices  $\{\epsilon^n\}$ :
     $\tilde{f}^1 = \mathcal{A}(\mathbf{A}^{(t)} \oplus \epsilon^1, \mathcal{V}_{Tr}), \dots, \tilde{f}^N = \mathcal{A}(\mathbf{A}^{(t)} \oplus \epsilon^N, \mathcal{V}_{Tr})$ 
    for each node  $v \in \mathcal{V}_{Tr}$  do
      Compute the frequency  $N_{y_v}$  for label  $y_v$ :  $N_{y_v} = \sum_{j=1}^N \mathbb{I}(\tilde{f}^j(\mathbf{A}^{(t)} \oplus \epsilon^j; v) = y_v)$ ;
      Estimate the low bound probability  $\underline{p}_{y_v}$  with confidence  $1 - \alpha$ :  $\underline{p}_{y_v} = B(\alpha; N_{y_v}, N - N_{y_v} + 1)$ ;
      Calculate the certified perturbation size  $K(\underline{p}_{y_v})$  using  $\underline{p}_{y_v}$  and algorithm in [35];
      Assign a weight  $w(v)$  to each node  $v$ :  $w^{(t)}(v) = \frac{1}{1 + \exp(a \cdot K(\underline{p}_{y_v}))}$ ;
    end
  end
  Define the certified robustness inspired training loss:
   $\mathcal{L}_{CR}(f, \mathbf{A}^{(t)}, \mathcal{V}_{Tr}) = \sum_{v \in \mathcal{V}_{Tr}} w^{(t)}(v) \cdot \ell(f(\mathbf{A}^{(t)}; v), y_v)$ ;
  // Stage 2: Running the Minmax attack with CR loss
  Step 1: Inner minimization over model parameter  $\theta$ :  $\theta^{(t+1)} = \theta^{(t)} - \eta_1 \nabla_{\theta} \mathcal{L}_{CR}(f_{\theta^{(t)}}, \mathbf{A}^{(t)}, \mathcal{V}_{Tr})$ ;
  Step 2: Outer maximization over graph perturbation  $\delta$ :
   $\delta^{(t+1)} = \text{Proj}_{\mathbb{B}}(\delta^{(t)} + \eta_2 \nabla_{\delta} \mathcal{L}_{CR}(f_{\theta^{(t+1)}}, \mathbf{A}^{(t)}, \mathcal{V}_{Tr})$ ;
  Update  $t = t + 1$ .
end
return  $\delta^{(T)}$ 

```

---
